# Supplementary material for: Complete lung agenesis caused by complex genomic rearrangements with neo-TAD formation at the SHH locus
Source: PubMed Central journal article supplement (PMC8460539; doi:10.1007/s00439-021-02344-6), 2021-08-26
Supplement: 439_2021_2344_MOESM1_ESM.pdf [file 439_2021_2344_MOESM1_ESM.pdf]

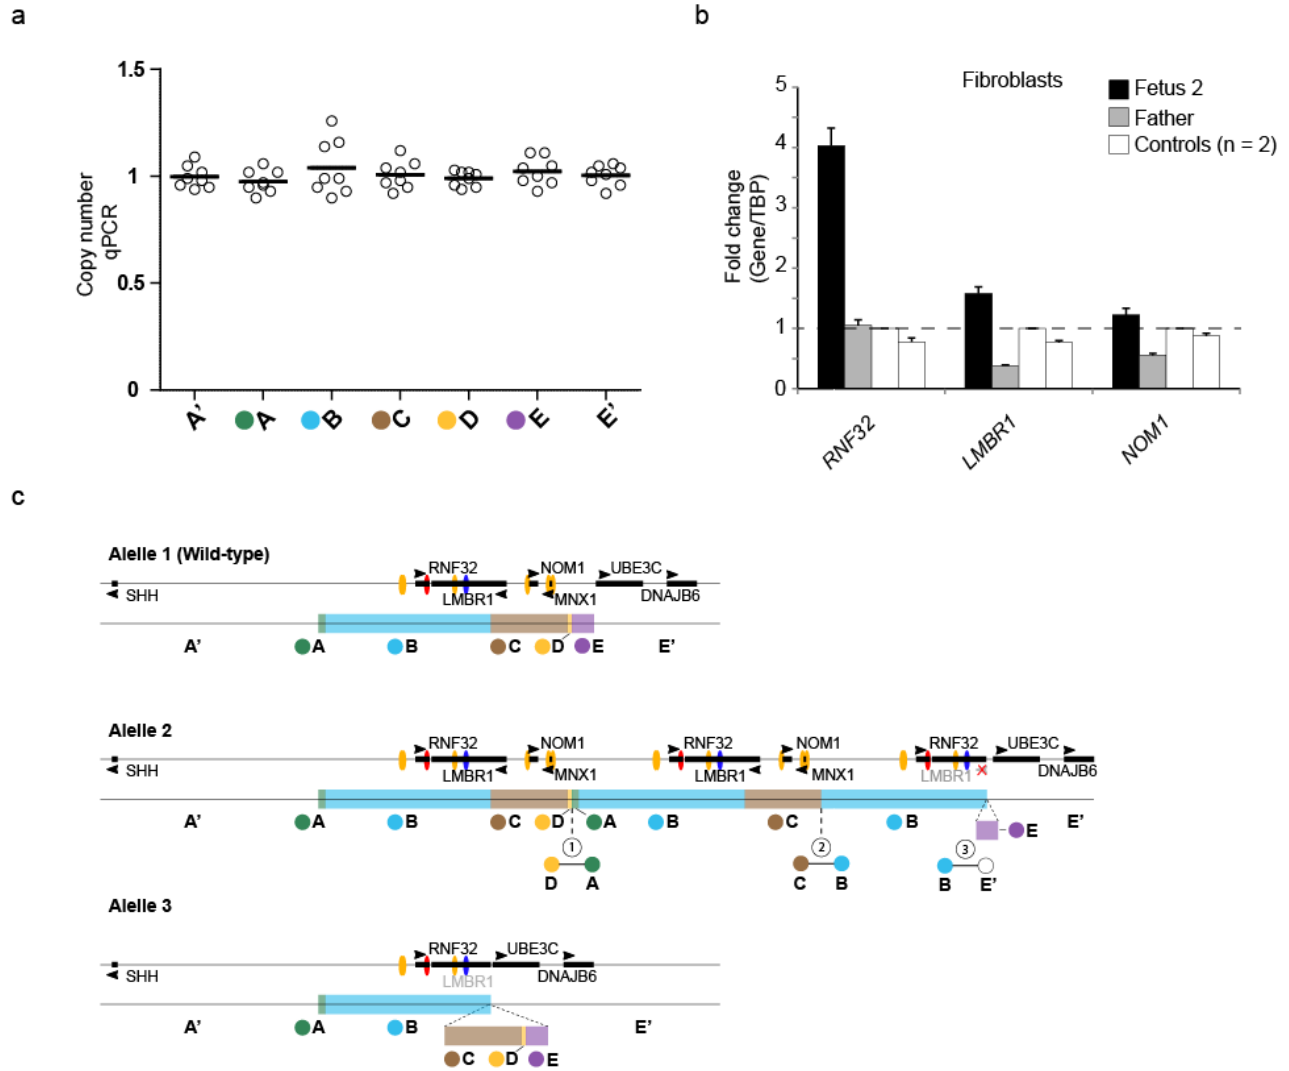

**Figure S1: Quantitative PCR in samples from the studied family.** (a) qPCR excluded the presence of the CGR in healthy relatives (paternal grandfather I-1, paternal grandmother I-2, mother II-2 and healthy female sibling III-2). Each dot represents the mean of three technical replicates per sample. Two qPCR replicates were performed per sample. The fragments A-E have different copy number values in the fetuses. Fragment A is shown in green, B in blue, C in brown, D in orange and E in purple. (b) RT-qPCR in fibroblasts from the Fetus 2 showed upregulation of *RNF32* and *LMBR1*, while *LMBR1* and *NOM1* were downregulated in the father, in comparison to two healthy controls. (c) Schematic representation of alleles likely to be present in the father's samples. The low copy number state of the C and D fragments in the father's samples is likely caused by the presence of a third allele, without the C, D and E fragments. In this scenario, the father is mosaic for three different combinations at different ratios (Allele 1 + Allele 2; Allele 1 + Allele 3; and Allele 2 + Allele 3). To achieve the copy number state observed in the father's

blood array CGH (**Fig. 2a**), 20% of his blood cells should consist of Allele 1 + Allele 2, 50% of Allele 1 + Allele 3 and 30% of Allele 2 + Allele 3. This mosaic scenario would explain the reduced *LMBR1* expression and the low copy number state of the C and D fragments in the father's samples.

A

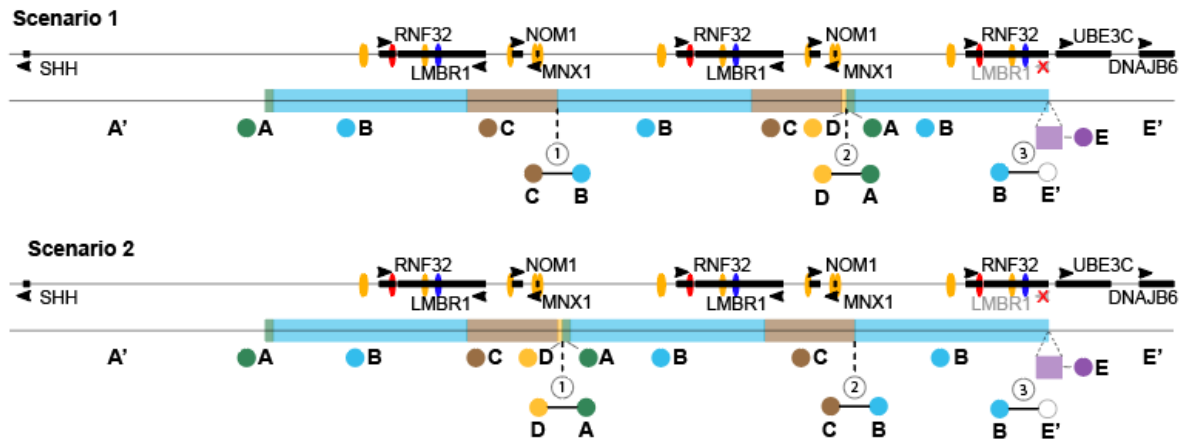

**Figure S2: Genes and enhancers at the 7q36.3 region.** (a) Genome sequencing breakpoint analysis disclosed two possible linear sequence scenarios. Scenario 1: A'-A-B-C-D-(1)-A-B-C-(2)-B-(3)-E' and Scenario 2: A'-A-B-C-(1)-B-C-D-(2)-A-B-(3)-E'.

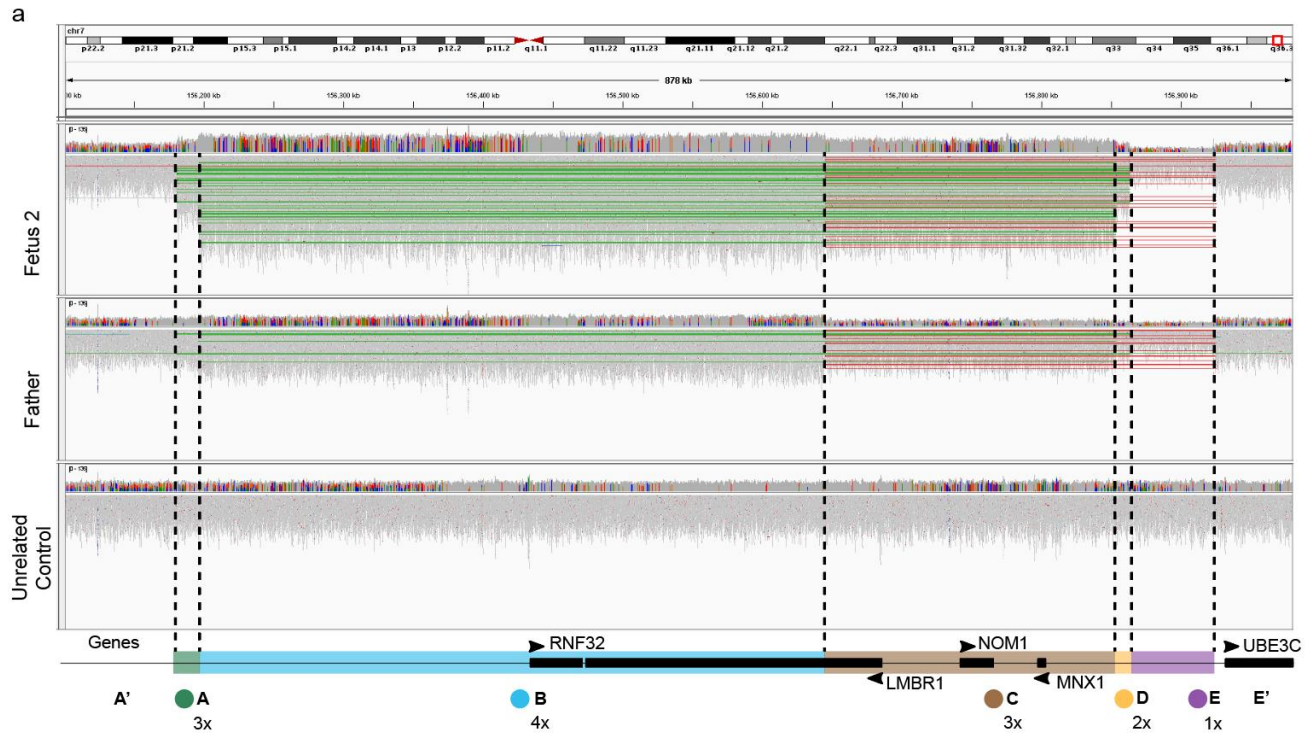

**Figure S3: Genome sequencing results visualized using the Integrative Genomics Viewer (IGV) browser. (a)** First and second panel: Split-reads in green show the duplication events in the Fetus 2 and the healthy father. Note that only few split-reads (green) are observed in the father GS, which supports mosaicism in his samples. Split-reads in red show the B-E' interaction. Last panel: GS from an unrelated healthy individual used as control.

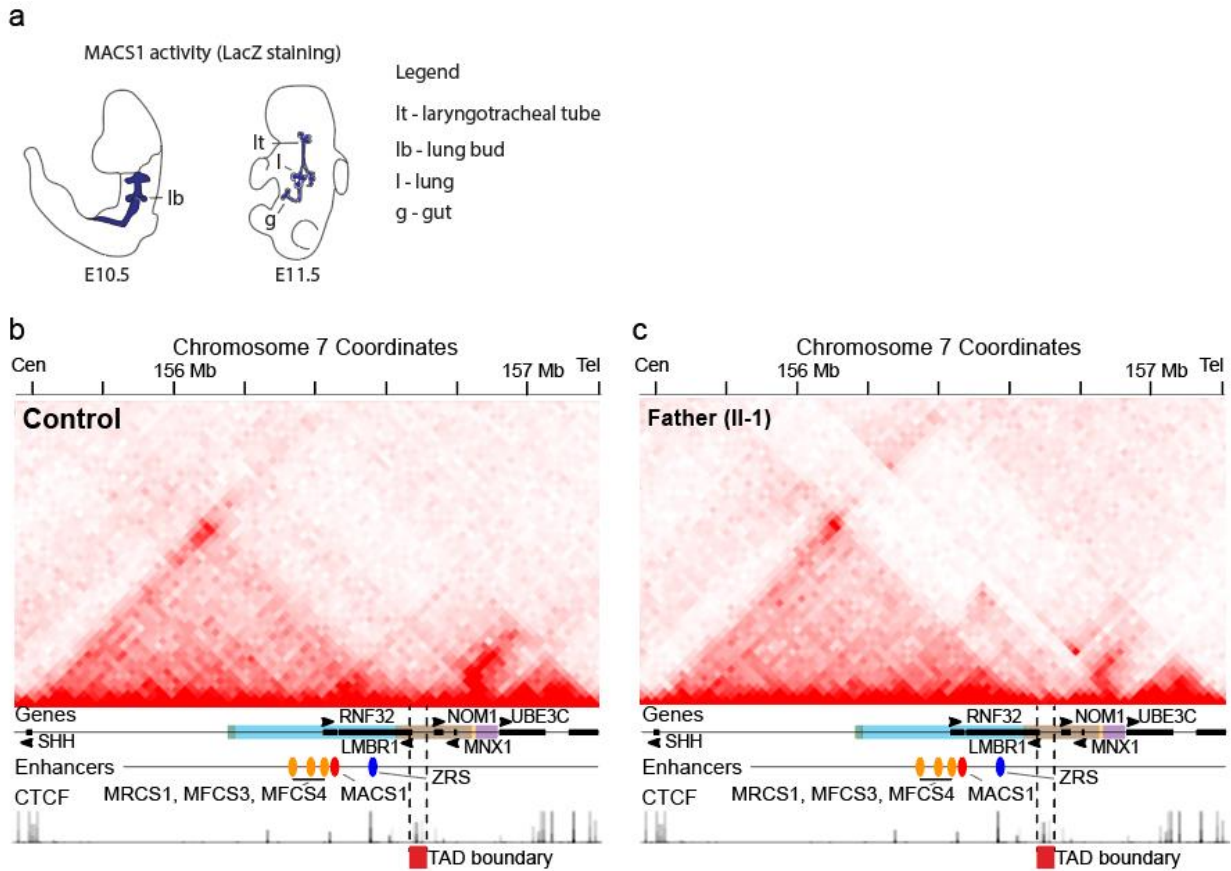

**Figure S4: Enhancer activity and Hi-C maps.** (A) Schematic representation of MACS1 enhancer activity, measured by LacZ staining, in mouse embryos at E10.5 and E11.5 (based on Sagai et al., 2009). (B) Control Hi-C map. The boundary separating both TADs (red square between the two dashed black lines) contains peaks of CTCF binding and it is located upstream the *LMBR1* transcription start site (TSS). ChIP-seq ENCODE data for CTCF (AG09309; human toe fibroblast from an apparently healthy adult). Note that the boundary is “located” in the C fragment. (B-D) The first neo-TAD is 680 kb long and the only way of creating this neo-TAD is by having C-D-A-B sequence in this order, followed by another C fragment, which contains the boundary. (C) Father Hi-C map showing a similar, but weaker, signal of ectopic chromatin interaction.
